# Supplementary material for: Influencing colloidal formation with optical traps
Source: Royal Society of Chemistry journal article supplement (doi:10.1039/c6sm02639g), 2017-01-01
Supplement: c6sm02639g1.pdf [file c6sm02639g1.pdf]

## Supporting Information

### Influencing Colloidal Formation with Optical Traps

Ifat Jacob, Eitan Edri, Erel Lasnoy, Silvia Pipreno and Hagay Shpaisman\*

Video files of the formation process of spherical and elongated colloids with an optical trap are attached (time accelerated X3).

Changes in Raman spectra for different cross-linker ratios (0% to 80%) of PDMS particles (that have not been manipulated with optical traps) are presented in Figure S1. The changes are expressed by the ratio between the Si-O stretching band (around  $485\text{ cm}^{-1}$ ) and the Si-C stretching band (around  $698\text{ cm}^{-1}$ ). As the cross linker ratio increases, the Si-C stretching band decreases (Si-O stretching band maxima was used for normalization for all spectra). This change is due to the lower amounts of Si-C bonds and higher Si-O bonds at high cross linker ratios.

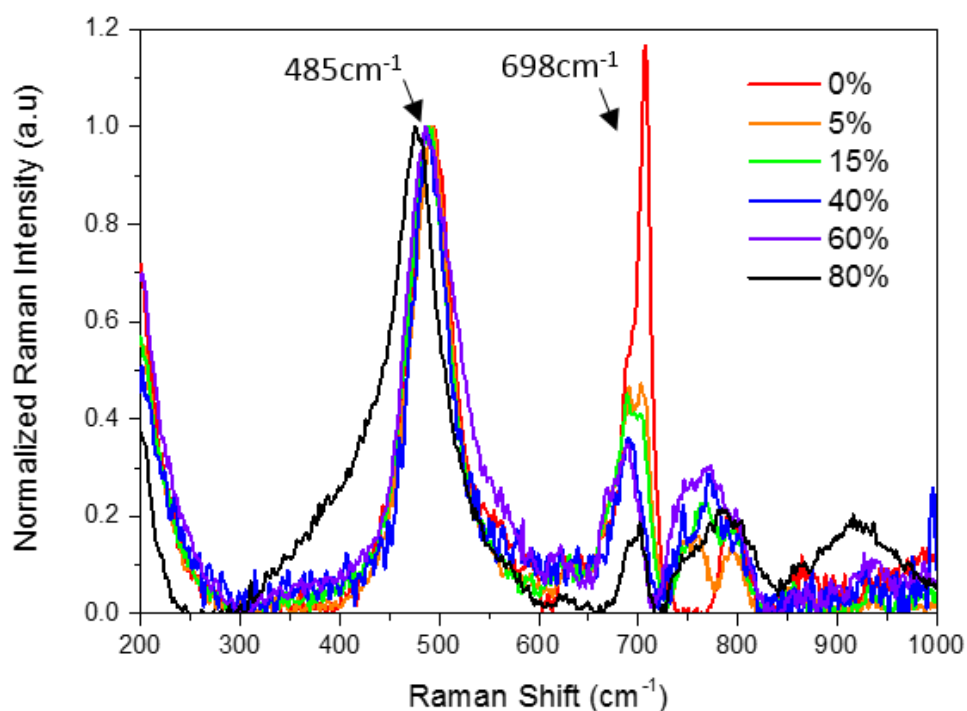

Figure S1: Raman spectra of PDMS particles with different cross-linker ratios.

Additionally, we observe (Figure S2) a shift in the Si-O stretching band as a function of cross-linker ratio. The band shifts from  $494\text{ cm}^{-1}$  for 0% cross-linker, to  $477\text{ cm}^{-1}$  for 80% cross-linker.

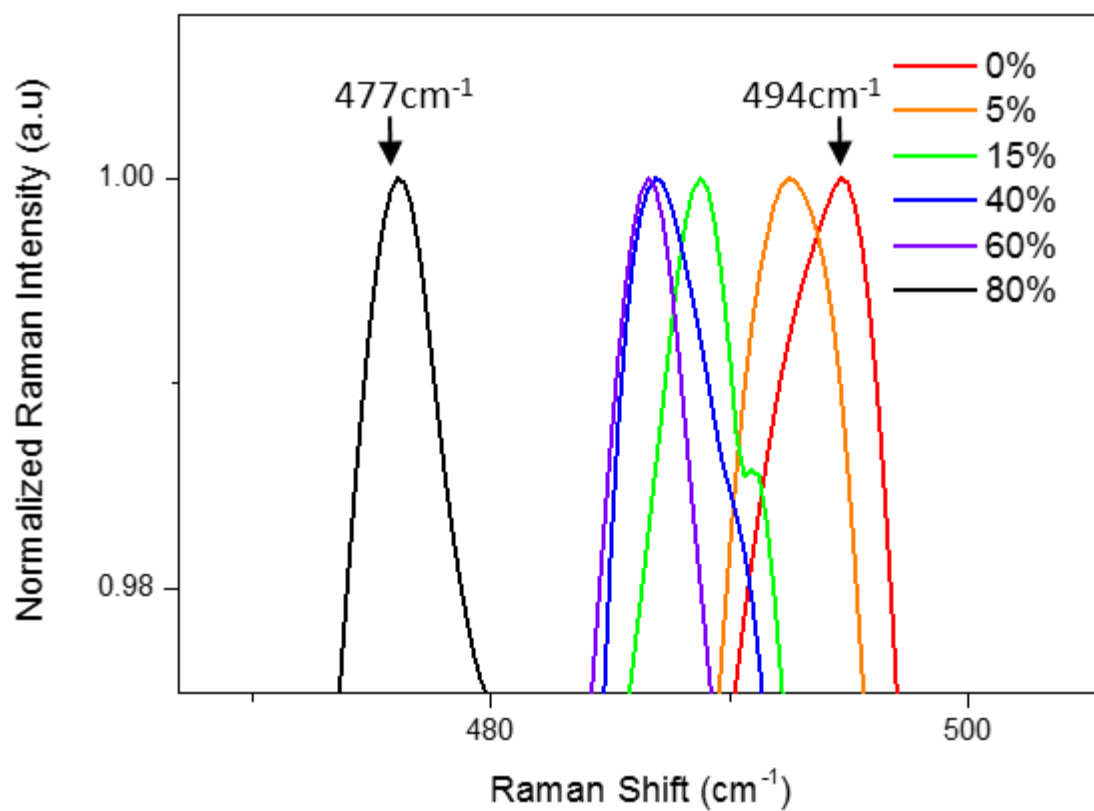

Figure S2: Si-O stretching band shift as a function of cross-linker ratio.
